# Supplementary material for: Cell Membrane Integrity in Myotonic Dystrophy Type 1: Implications for Therapy
Source: PubMed Central journal article supplement (PMC4370802; doi:10.1371/journal.pone.0121556), 2015-03-23
Supplement: pone.0121556.s001.pdf [file pone.0121556.s001.pdf]

# Supporting Figure S1

**A**

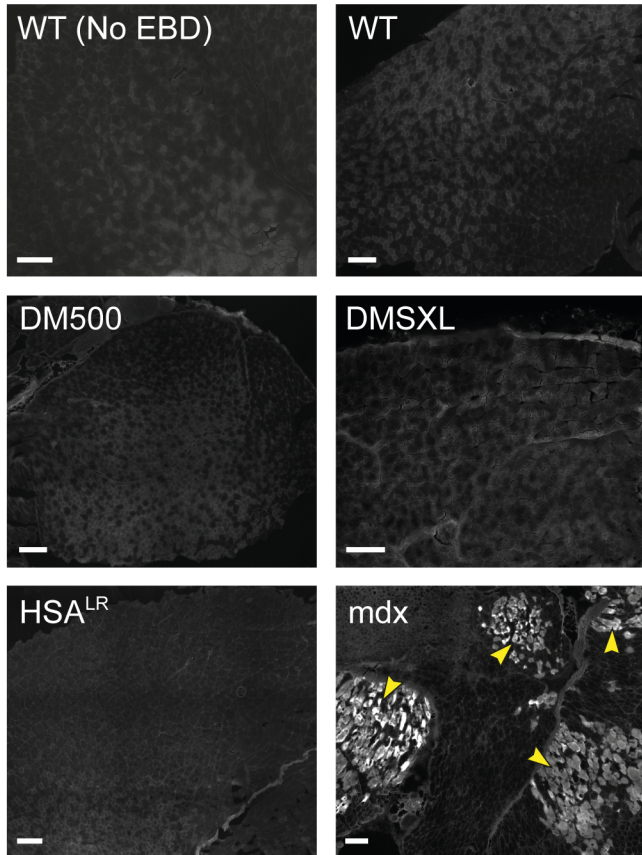

**C**

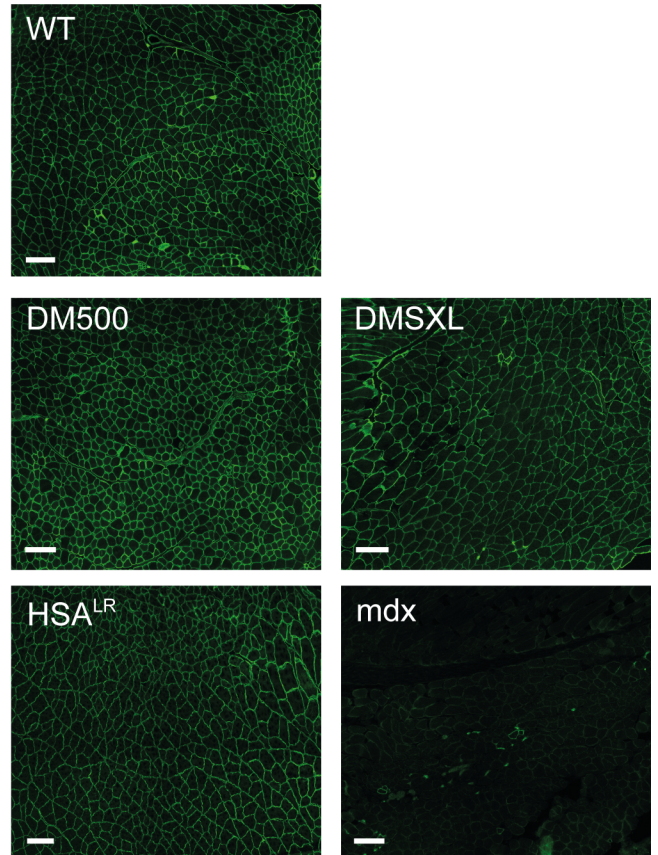

**B**

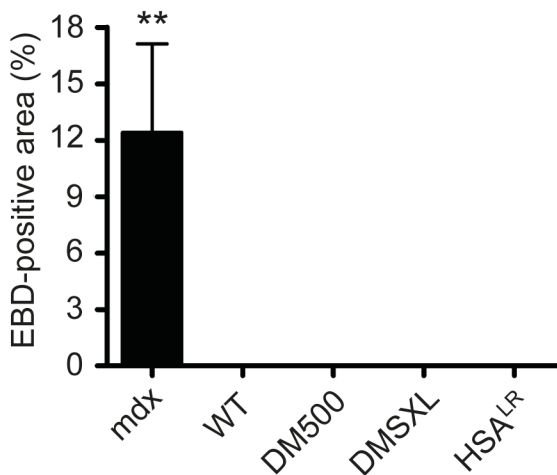

## Supporting Fig. S1. Membrane integrity analysis of gastrocnemius muscle. (A)

Representative images of gastrocnemius sections from DM1 mice and controls after injection with EBD after exercise. Scale bars indicate 200  $\mu$ m. One WT mouse was not injected to appreciate autofluorescent background signal (No EBD). Areas with EBD-positive fibers were regularly seen in mdx samples (arrowheads) but never in WT nor DM1 model samples. (B) Quantification of percentage of EBD-positive area compared to total muscle section (n=4 per group). (C) Representative images of gastrocnemius sections stained for dystrophin. Scale bars indicate 150  $\mu$ m. Staining intensity and pattern observed in WT animals were very similar to those observed in DM500, DMSXL and HSA<sup>LR</sup> mice. As expected, essentially no signal was detected in mdx mice.
