# Supplementary material for: Cell Membrane Integrity in Myotonic Dystrophy Type 1: Implications for Therapy
Source: PLOS journal article supplement (doi:10.1371/journal.pone.0121556), 2015-03-23
Supplement: S4 (10.1371/journal.pone.0121556.s004) [file journal.pone.0121556.s004]

# Supporting Figure S4

A

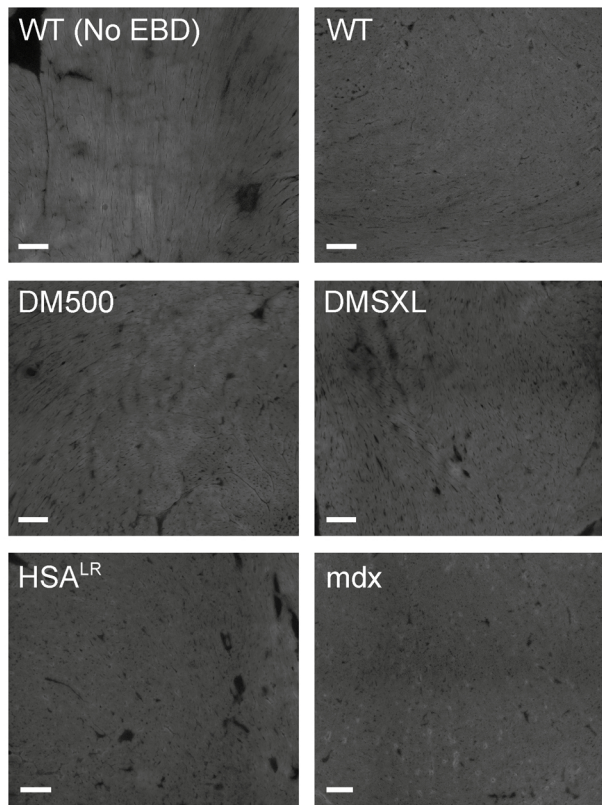

B

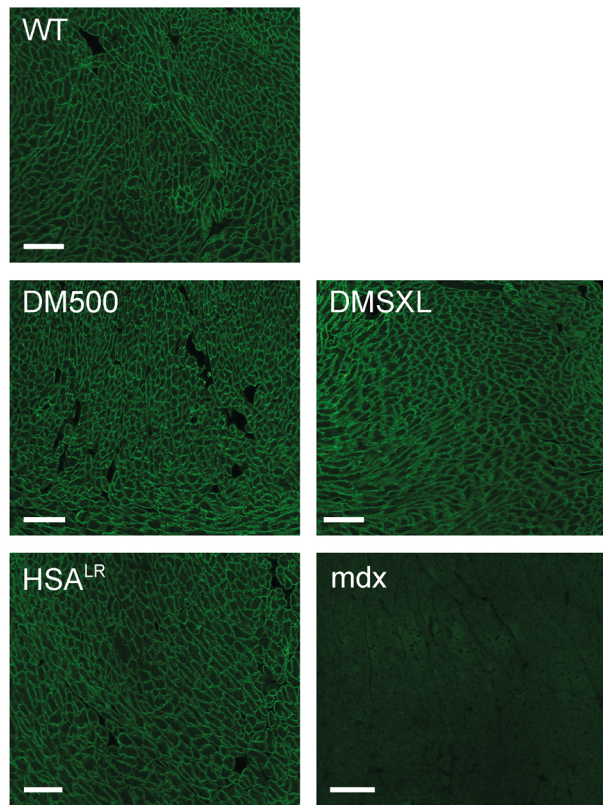

**Supporting Fig. S4. Membrane integrity analysis of heart muscle. (A)** Representative images of heart sections from DM1 mice and controls after injection with EBD after exercise. Scale bars indicate 100  $\mu$ m. One WT mouse was not injected to appreciate autofluorescent background signal (No EBD). **(B)** Representative images of heart sections stained for dystrophin. Scale bars indicate 100  $\mu$ m. Staining intensity and pattern observed in WT animals were very similar to those observed in DM500, DMSXL and HSA<sup>LR</sup> mice. As expected, essentially no signal was detected in mdx mice.
