# Supplementary material for: Cell Membrane Integrity in Myotonic Dystrophy Type 1: Implications for Therapy
Source: PLOS journal article supplement (doi:10.1371/journal.pone.0121556), 2015-03-23
Supplement: S6 (10.1371/journal.pone.0121556.s006) [file journal.pone.0121556.s006]

# Supporting Figure S6

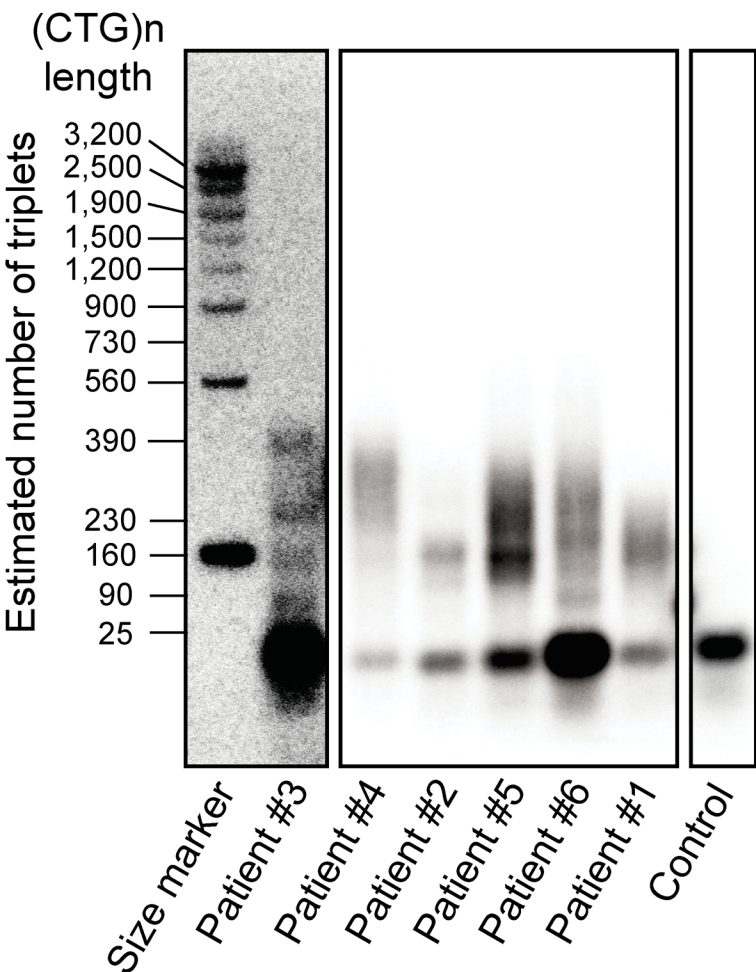

**Supporting Fig. S6. (CTG)<sub>n</sub> repeat length determination in human muscle biopsies.** Genomic DNA isolated from human muscle biopsies was used in a heat pulse extension PCR protocol to amplify the (CTG)<sub>n</sub> repeat of DMPK genes. Control sample represents genomic DNA from a healthy individual carrying a (CTG)<sub>5</sub> and a (CTG)<sub>12</sub> repeat. The smears in patient samples demonstrate somatic instability. The size marker at the left indicates the estimated number of CTG triplets. Note that lane 1 and 2 were exposed longer for clarity.
